# Supplementary material for: Prediction of Vitamin A Stores in Young Children Provides Insights into the Adequacy of Current Dietary Reference Intakes
Source: PubMed Central journal article supplement — Curr Dev Nutr. 2020 Jul 13;4(8):nzaa119. doi: 10.1093/cdn/nzaa119 (PMC7419538; doi:10.1093/cdn/nzaa119), 2020-07-13
Supplement: nzaa119_supplemental_file.pdf [file nzaa119_supplemental_file.pdf]

Prediction of Vitamin A Stores in Young Children Provides Insights into the Adequacy of Current Dietary Reference Intakes. JL Ford. Online Supplementary Materials

**Supplemental WinSAAM Deck**

```

A SAAM31      FCR SIMULATED FOR 4 POPULATIONS
C=COMMENT CARD
CC PARAMETERS
CC P(1)=GENERAL PARAMETER
CC K(I)=LINEAR PARAMETER
H PAR
  P(1)      6.508580E-03  0.000000E+00  1.000000E+01
  K(81)     2.807695E-02  0.000000E+00  1.000000E+01
  K(82)     1.194703E-03  0.000000E+00  1.000000E+01
  K(83)     2.082691E-03  0.000000E+00  1.000000E+02
  K(84)     2.299949E-03  0.000000E+00  1.000000E+02
  K(85)     2.137499E-03  0.000000E+00  1.000000E+02
CC DATA
H DAT
CC EXPONENTIAL FUNCTION FCR=A^(-X*AGE)+B
CC A=K(81); X=P(1); AGE=T
CC B=K(I) AND "B" IS INDEPENDENT FOR EACH POPULATION
CC XG(I)=TIME-DEPENDENT FUNCTION
CC      AGE          FCR          FRACTIONAL SD
C MEXICO
101G(1)          FSD=0.05
XG(1)=K(81)*EXP(-P(1)*T)+K(82)
      0          0.03
      791        0.00135
      1764       0.0012
C PHILIPPINES
102G(2)          FSD=0.05
XG(2)=K(81)*EXP(-P(1)*T)+K(83)
      0          0.03
      426        0.00384
C GUATEMALA
104G(4)          FSD=0.05
XG(4)=K(81)*EXP(-P(1)*T)+K(85)
      0          0.03
      1521       0.00214
C BANGLADESH
103G(3)          FSD=0.05
XG(3)=K(81)*EXP(-P(1)*T)+K(84)
      0          0.03
      365        0.00492
CC FCR SIMULATIONS FOR EACH POPULATION
CC DUE TO EXTENSIVE SIMULATIONS, ONLY SIMULATE FOR 1 POPULATION AT A
CC TIME
CC MEXICO
101G(1)
      0
2          1          1825
CC E.G., TO SIMULATE ONLY FOR MEXICO, "Y" INDICATES EVERYTHING

```

CC FOLLOWING IS EXCLUDED

Y

CC PHILIPPINES

102G(2)

0

2 1

1825

CC GUATEMALA

103G(3)

0

2 1

1825

CC BANGLADESH

104G(4)

0

2 1

1825

**Supplemental Table 1.** Reported VA intakes by age for children in Bangladesh, the Philippines, Guatemala, and Mexico<sup>1</sup>

|                                  |                      | Bangladeshi                     | Filipino            | Guatemalan           | Mexican             |
|----------------------------------|----------------------|---------------------------------|---------------------|----------------------|---------------------|
| Age                              |                      | Reported VA intake (µmol RAE/d) |                     |                      |                     |
| <b>Breastmilk (100%, 0-6 mo)</b> |                      |                                 |                     |                      |                     |
| 0-1 mo                           | 1 d <sup>§</sup>     | 0.1022                          |                     |                      |                     |
|                                  | 2 d <sup>§</sup>     | 0.2720                          |                     |                      |                     |
|                                  | 3 d <sup>§</sup>     | 0.5108                          |                     |                      |                     |
|                                  | 4-15 d <sup>▲</sup>  | 0.4275 <sup>a</sup>             | 0.7327 <sup>b</sup> | 1.6219 <sup>c</sup>  | 0.5909 <sup>d</sup> |
|                                  | 15-30 d <sup>▲</sup> |                                 |                     |                      | 0.8594 <sup>d</sup> |
| 1-3 mo <sup>▲</sup>              | 30-75 d              | 1.0300 <sup>a</sup>             |                     | 1.3211 <sup>c</sup>  | 1.1000 <sup>d</sup> |
|                                  | 75-91 d              |                                 |                     |                      |                     |
| 3-6 mo <sup>▲</sup>              | 91-183 d             |                                 |                     | 0.4675 <sup>b</sup>  |                     |
| 6-7 mo <sup>▲</sup>              | 183-213 d            | 0.7800 <sup>a</sup>             | 0.9075 <sup>†</sup> | 0.9216 <sup>c*</sup> | 1.3444              |
| 7-9 mo <sup>▲</sup>              | 213-274 d            |                                 |                     |                      |                     |
| 9-10 mo <sup>▲</sup>             | 274-304 d            | 1.0054 <sup>a</sup>             | 0.916 <sup>†</sup>  | 1.84 <sup>*</sup>    |                     |
| 10 mo-1 y <sup>▲</sup>           | 304-365 d            |                                 |                     | 1.535 <sup>*</sup>   |                     |
| <b>Food sources (100%, 1-5y)</b> |                      |                                 |                     |                      |                     |
| 12-15 mo                         | 365-456 d            | 0.7904                          | 1.2821 <sup>‡</sup> | 2.3907 <sup>*</sup>  | 1.3444              |
| 15-18 mo                         | 456-548 d            |                                 | 0.806               | 2.5865 <sup>*</sup>  |                     |
| 18 mo-2 y                        | 548-730 d            |                                 |                     |                      |                     |
| 2-3 y                            | 730-1095 d           | 0.729                           | 1.274               | 1.8935               | 1.5052              |
| 3-4 y                            | 1095-1460 d          |                                 | 0.974               | 2.6713               | 1.4196              |
| 4-5 y                            | 1460-1865 d          |                                 | 1.6818              |                      |                     |

<sup>1</sup> Shown are vitamin A (VA) intakes reported in the literature for each country by age group.

<sup>§</sup> Colostrum VA concentration from days 1-3 [(49), unpublished results, Veronica Lopez-Teros, Universidad de Sonora, Mexico]

<sup>▲</sup> Common References used (6,32,38,39)

<sup>a</sup> Exclusively breastfed for the first year (33)

<sup>b</sup> Exclusively breastfed for the first 6 mo (39,42).

<sup>†</sup> Breastmilk provided 52% of total VA intake from 6-12 mo and <sup>‡</sup> 37% from 12-15 mo [estimated from (39,42)].

<sup>c</sup> Exclusively breastfed for the first 7 mo (39).

<sup>\*</sup> Breastmilk contributed ~60% to total VA intake from 7-12 mo and 30% from 12-18 mo (50).

<sup>•</sup> Entirely from foods plus fortified sugar provided 1 µmol retinol/d from 1-3 y (46).

<sup>d</sup> Exclusively breastfed for the first 6 mo; then, intake was entirely from foods from 6 mo-5 y (14).

For Guatemalan and Filipino children, we also considered periodic consumption of VA from micronutrient powders (41,46). All countries received VA supplementation under different regimes (see Methods section).
